# Supplementary material for: Comparison of Fine-Needle Biopsy (FNB) versus Fine-Needle Aspiration (FNA) Combined with Flow Cytometry in the Diagnosis of Deep-Seated Lymphoma
Source: MDPI journal article supplement (doi:10.3390/diagnostics13172777), 2023-08-28
Supplement: s1 [file s1]

**Table S2. Diagnostic rate of Lymphoma Located in the Retroperitoneum**

|                                                                 | <b>FNB(n=20)</b> | <b>FNA(n=23)</b> | <b>OR (95% CI)</b>        | <b>P-value</b> |
|-----------------------------------------------------------------|------------------|------------------|---------------------------|----------------|
| No. of cases consistent with final diagnosis by IHC, n (%)      | 19 (94.70%)      | 14(60.90%)       | 12.214<br>(1.383-107.865) | 0.011*         |
| No. of cases consistent with final diagnosis by IHC+ FCM, n (%) | 20<br>(100.00%)  | 23(100.00%)      | -                         | -              |

\*  $P < 0.05$ .
