# Supplementary material for: Comparison of Fine-Needle Biopsy (FNB) versus Fine-Needle Aspiration (FNA) Combined with Flow Cytometry in the Diagnosis of Deep-Seated Lymphoma
Source: MDPI journal article supplement (doi:10.3390/diagnostics13172777), 2023-08-28
Supplement: s1 [file s1]

**Table S3. Univariate and multivariate logistic regression analysis –diagnostic rate combined with FCM**

| Variable                 | Univariate logistic regression |               |         | Multivariate logistic regression |             |         |
|--------------------------|--------------------------------|---------------|---------|----------------------------------|-------------|---------|
|                          | Exp(b)                         | OR (95% CI)   | P-value | Exp(b)                           | OR (95% CI) | P-value |
| Needle type (FNA vs FNB) | 1.526                          | 0.058-40.182  | 0.770   | -                                | -           | -       |
| Needle size              | 1.460                          | 0.280-7.622   | 0.605   | -                                | -           | -       |
| Lesion site              | 4.626                          | 0.918-26.493  | 0.051   | 1.091                            | 1.008-1.180 | 0.038*  |
| Lesion size              | 3.800                          | 0.142-101.965 | 0.360   | -                                | -           | -       |
| No. of lesions           | -                              | -             | -       | 0.920                            | 0.826-1.024 | 0.122   |

\*  $P < 0.05$ .
