# Supplementary material for: Comparison of Fine-Needle Biopsy (FNB) versus Fine-Needle Aspiration (FNA) Combined with Flow Cytometry in the Diagnosis of Deep-Seated Lymphoma
Source: MDPI journal article supplement (doi:10.3390/diagnostics13172777), 2023-08-28
Supplement: s1 [file s1]

**Table S1. Stratification by lesion size – diagnostic rate**

|                                                                 | <b>FNB(n=23)</b> | <b>FNA(n=30)</b> | <b>OR (95% CI)</b>        | <b>P-value</b> |
|-----------------------------------------------------------------|------------------|------------------|---------------------------|----------------|
| <b>&lt; 20 mm, n</b>                                            | <b>3</b>         | <b>8</b>         |                           |                |
| No. of cases consistent with final diagnosis by IHC, n (%)      | 3 (100.00%)      | 1 (12.50%)       | 8.000<br>(1.279 – 50.040) | 0.024*         |
| No. of cases consistent with final diagnosis by IHC+ FCM, n (%) | 3 (100.00%)      | 7 (87.50%)       | 1.143<br>(0.880 – 1.485)  | 1.000          |
| <b>≥ 20 mm, n</b>                                               | <b>20</b>        | <b>22</b>        |                           |                |
| No. of cases consistent with final diagnosis by IHC, n (%)      | 18 (90.00%)      | 17 (77.30%)      | 2.647<br>(0.451 – 15.521) | 0.414          |
| No. of cases consistent with final diagnosis by IHC+ FCM, n (%) | 20 (100.00%)     | 22 (100.00%)     | -                         | -              |

\*  $P < 0.05$
